# Supplementary material for: Isolation of Cardanol Fractions from Cashew Nutshell Liquid (CNSL): A Sustainable Approach
Source: MDPI journal article supplement (doi:10.3390/suschem5020006), 2024-04-01
Supplement: s1 [file s1]

## Supporting information

# Isolation of Cardanol Fractions from Cashew Nutshell Liquid (CNSL): A Sustainable Approach

Bhavika Bhatia, Nagarjuna Amarnath, Sumit K. Rastogi, and Bimlesh Lochab\*

Materials Chemistry Laboratory, Department of Chemistry, School of Natural Sciences, Shiv Nadar Institution of Eminence, Gautam Buddha Nagar, Uttar Pradesh 201314, India  
Correspondence: bimlesh.lochab@snu.edu.in

|                                                                                                       |   |
|-------------------------------------------------------------------------------------------------------|---|
| Figure S1. TLC of Cardanol mixture along with the purified fractions                                  | 1 |
| Figure S2. Method1 for Flash Column Chromatography                                                    | 2 |
| Figure S3. Method2 for Flash Column Chromatography                                                    | 2 |
| Experimental procedure for epoxidation reaction of cardanol triene derivative                         | 3 |
| Figure S4. $^1\text{H}$ NMR of crude cardanol tri-epoxide. Recorded in $\text{CDCl}_3$ (NMR 400 MHz). | 3 |

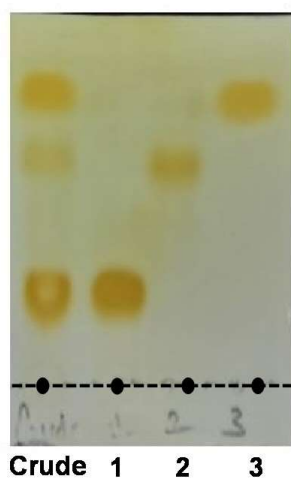

Figure S1: TLC image. crude CNSL, 1 stands for triene, 2 for diene, and 3 for monoene.

|                            |                                |                        |                              |
|----------------------------|--------------------------------|------------------------|------------------------------|
| Column: Reveleris® C18 80g | Solvent A: Water               | UV Threshold: 2 AU     | ELSD Threshold: 50 mV        |
| Flow Rate: 35 mL/min       | Solvent B: MeOH:ACN 70:30      | UV Sensitivity: Low    | ELSD Sensitivity: Low        |
| Equilibration: 3.0 min     | Solvent C: <No solvent chosen> | UV1 Wavelength: 220 nm | Collection Mode: Collect Non |
| Run Length: 155.0 min      | Solvent D: <No solvent chosen> | UV2 Wavelength: 254 nm | Per-Vial Volume: 25 mL       |
| Injection Type: Dry        | Slope Detection: Off           | UV3 Wavelength: 280 nm | Non-Peak Volume: 25 mL       |

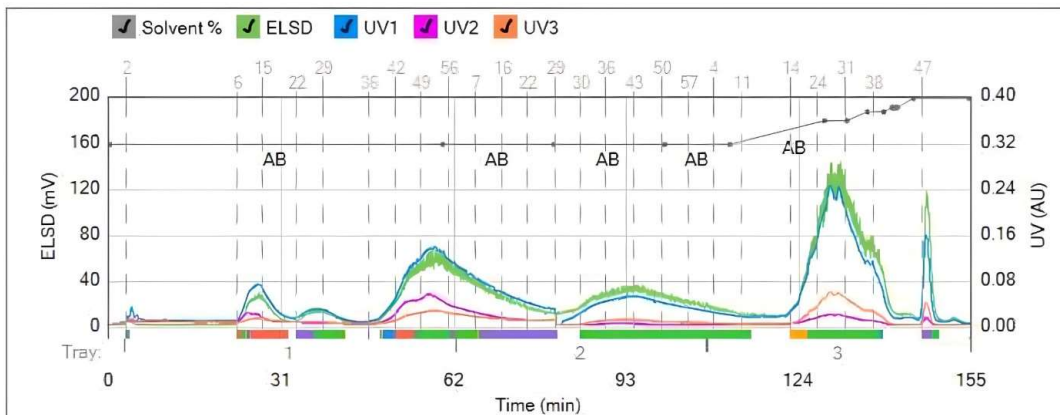

**Figure S2:** Method 1 used for flash column chromatography purification of crude CNSL.

|                               |                                  |
|-------------------------------|----------------------------------|
| Method Name: Cardanol method  | Per-Vial Volume: 25 mL           |
| Column: Reveleris® C18 80g    | Non-Peaks: 25 mL                 |
| Flow Rate: 50 mL/min          | UV1 Wavelength: 220 nm           |
| Equilibration: 5.0 min        | UV2 Wavelength: 280 nm           |
| Run Length: 73.0 min          | ELSD Carrier: Iso-propanol       |
| Air Purge Time: 0 min         | Solvent A: ACN:WATER:AA(80:20:1) |
| Slope Detection: Off          | Solvent B: Acetonitrile          |
| ELSD Threshold: 3 mV          | Solvent C: <No solvent chosen>   |
| UV Threshold: 0.02 AU         | Solvent D: <No solvent chosen>   |
| Collection Mode: Collect None | Injection Type: Dry              |

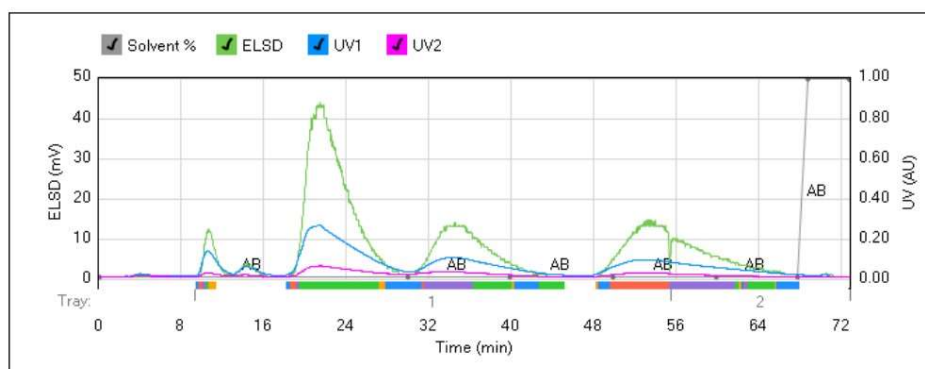

**Figure S3:** Method 2 used for flash column chromatography purification of crude CNSL.

**Experimental procedure for the epoxidation of triene cardanol (cardanol tri-epoxide):** Isolated cardanol triene (10 mmol, 2.98 g), glacial acetic acid (2.5 equiv. 1.43 mL), and amberlite (0.5 equiv., 1.5 g) were taken in a 100 mL round bottom flask. The reaction mixture was degassed under a vacuum and charged with nitrogen followed by toluene (15 mL). To this reaction mixture, H<sub>2</sub>O<sub>2</sub> (4.5 equiv., 1.47 mL) was added dropwise and stirred at 55 °C for 7 h. The progress of the reaction mixture was monitored by TLC and after completion of the reaction the crude product was filtered and washed with saturated sodium carbonate followed by water. Removal of solvent under vacuum gave crude cardanol tri-epoxide (50% conversion of cardanol triene, calculated from the residual alkene Hs in triene, 5.93-5.76 ppm).

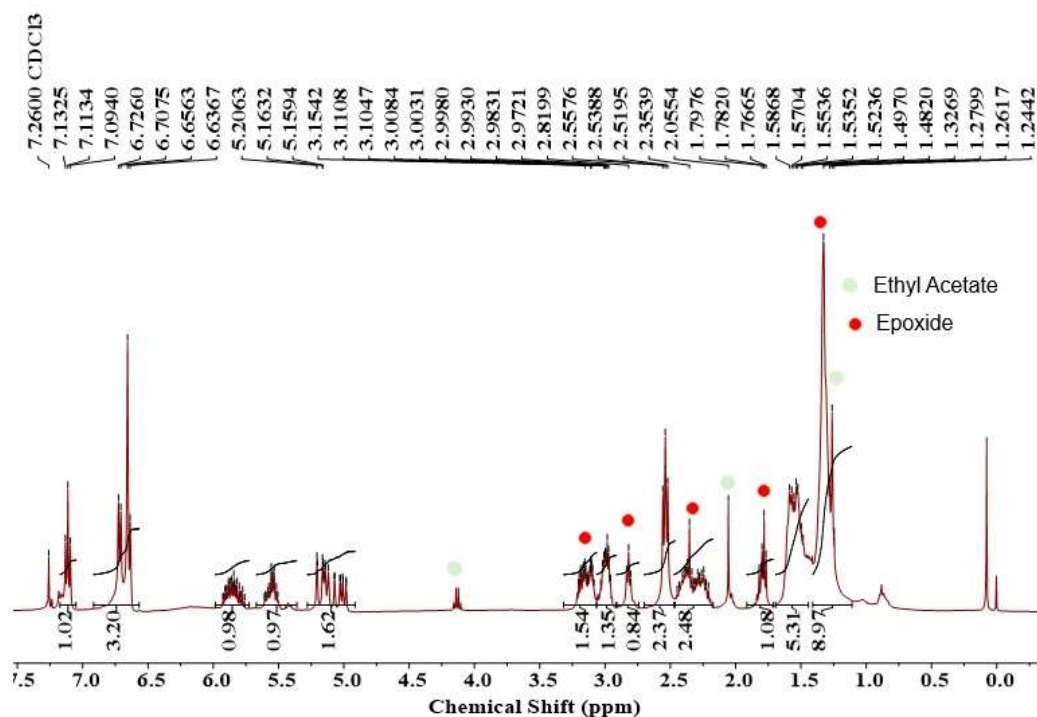

**Figure S4.** <sup>1</sup>H NMR of crude cardanol tri-epoxide. Recorded in CDCl<sub>3</sub> (NMR 400 MHz).
